# Supplementary material
Source: PubMed Central journal article supplement (PMC6918849)
Supplement: Suppl_FigS1.pdf [file Suppl_FigS1.pdf]

## Supplementary Data

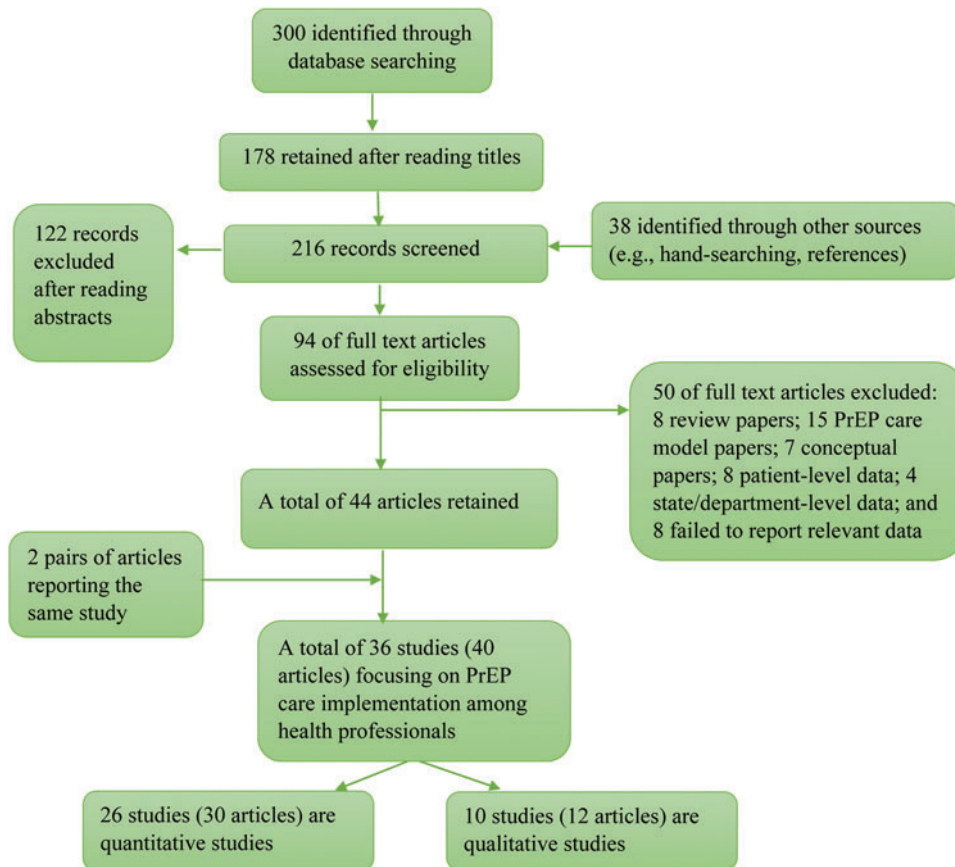

**SUPPLEMENTARY FIG. S1.** Flowchart of study selection procedure. A total of 40 articles (36 studies) were identified by December 31, 2018. Databases: Pubmed, Web of Science, Google Scholar, Proquest, and hand searching (e.g., references).
