# Supplementary material
Source: PubMed Central journal article supplement (PMC6918849)
Supplement: Suppl_FigS2.pdf [file Suppl_FigS2.pdf]

**a** Summary of PrEP Awareness

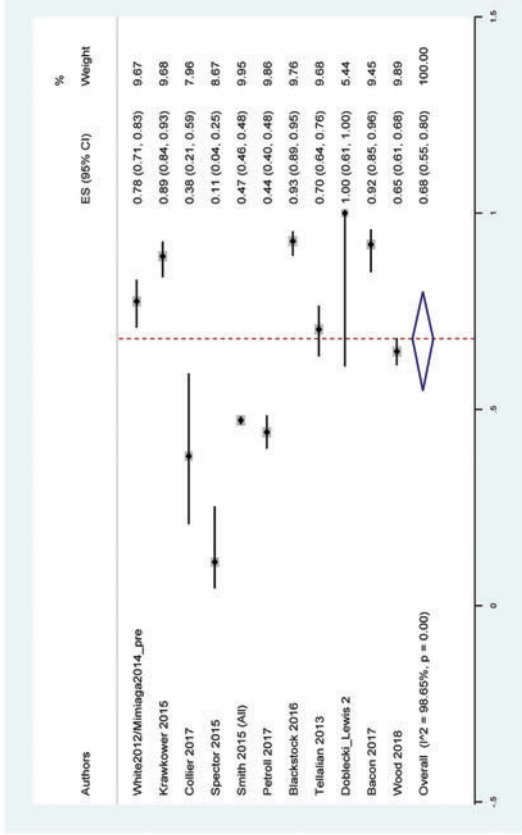

**b** Summary of willingness of PrEP prescription

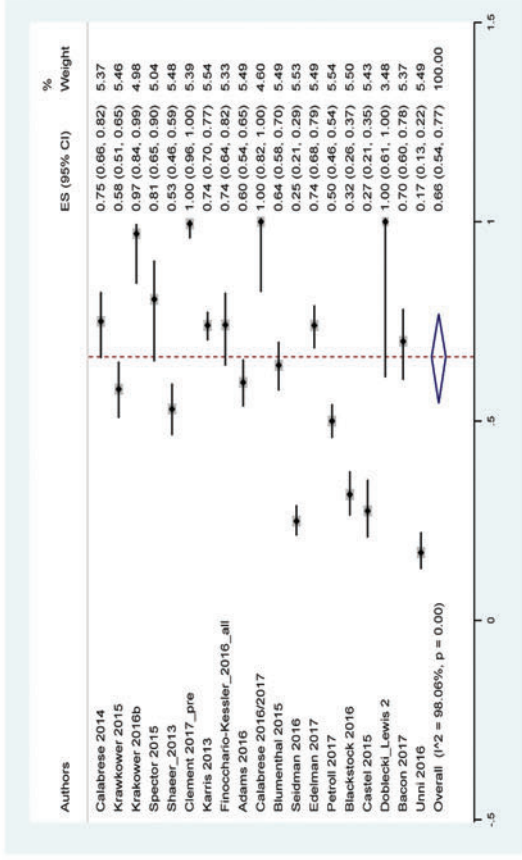

**c** Summary of PrEP consultation

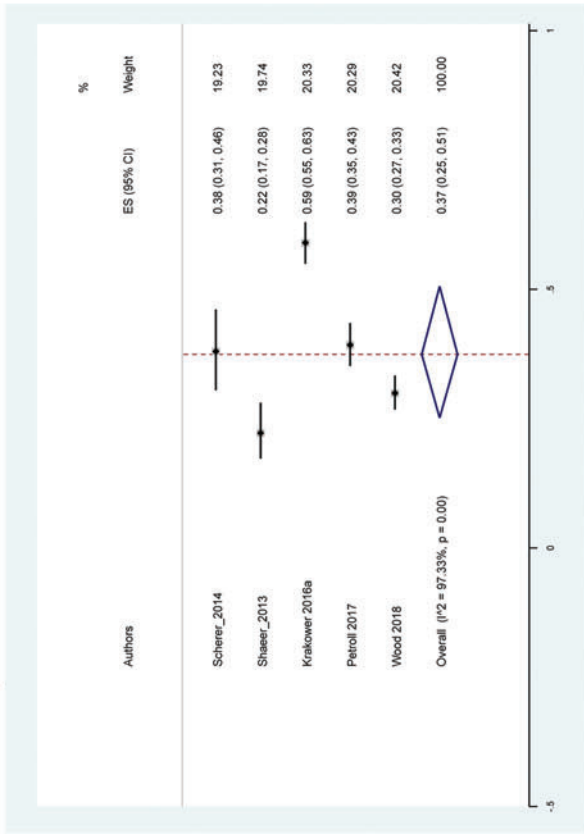

**d** Summary of PrEP prescription

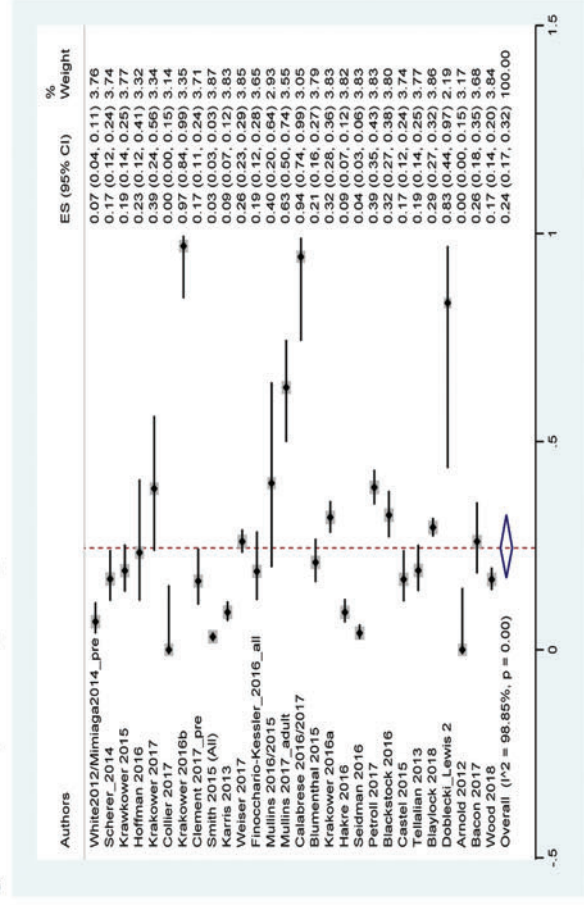

**SUPPLEMENTARY FIG. S2.** Forest plots for PrEP care implementation among health providers. **(a)** Summary of PrEP awareness. **(b)** Summary of willingness of PrEP prescription. **(c)** Summary of PrEP consultation. **(d)** Summary of PrEP prescription. PrEP, pre-exposure prophylaxis.
