# Supplementary material
Source: PubMed Central journal article supplement (PMC6918849)
Supplement: Suppl_FigS3.pdf [file Suppl_FigS3.pdf]

### PrEP awareness, willingness and prescription between Infectious Specialists and Primary Care Providers (Forest plot by years)

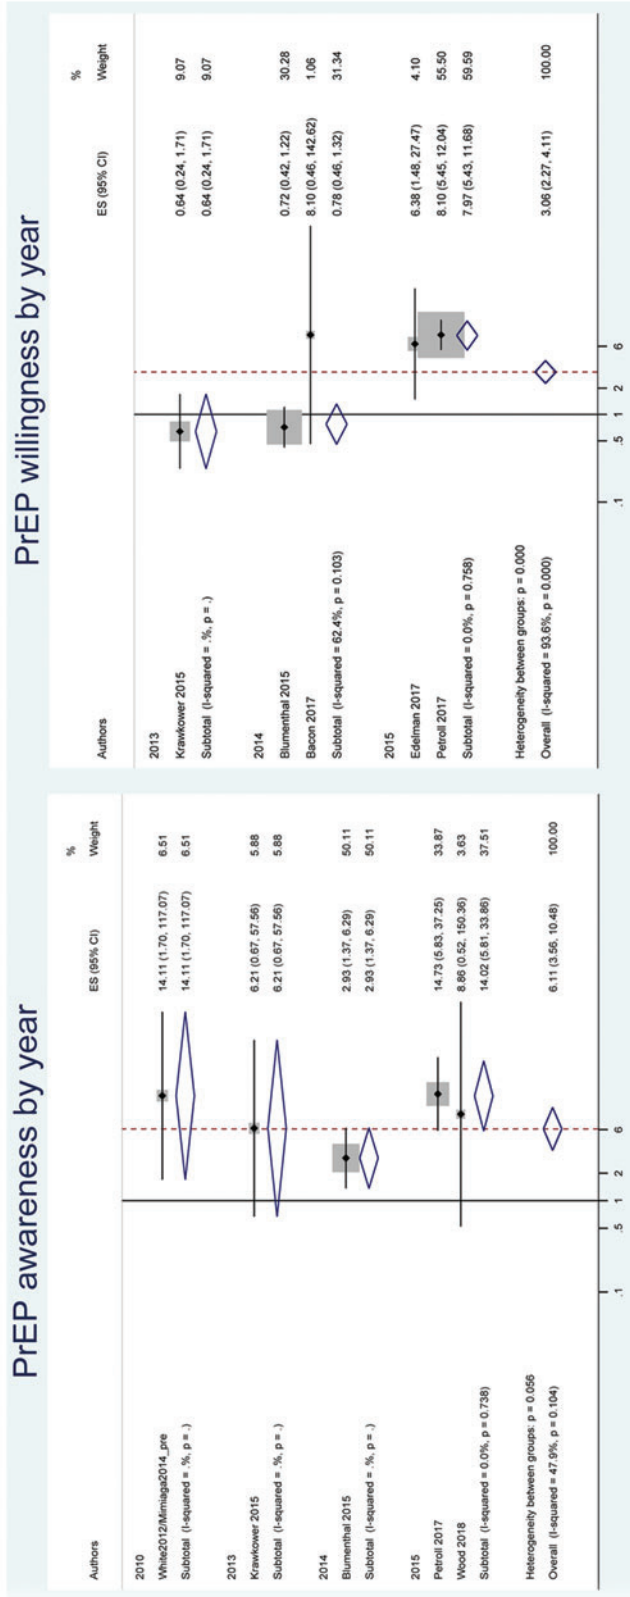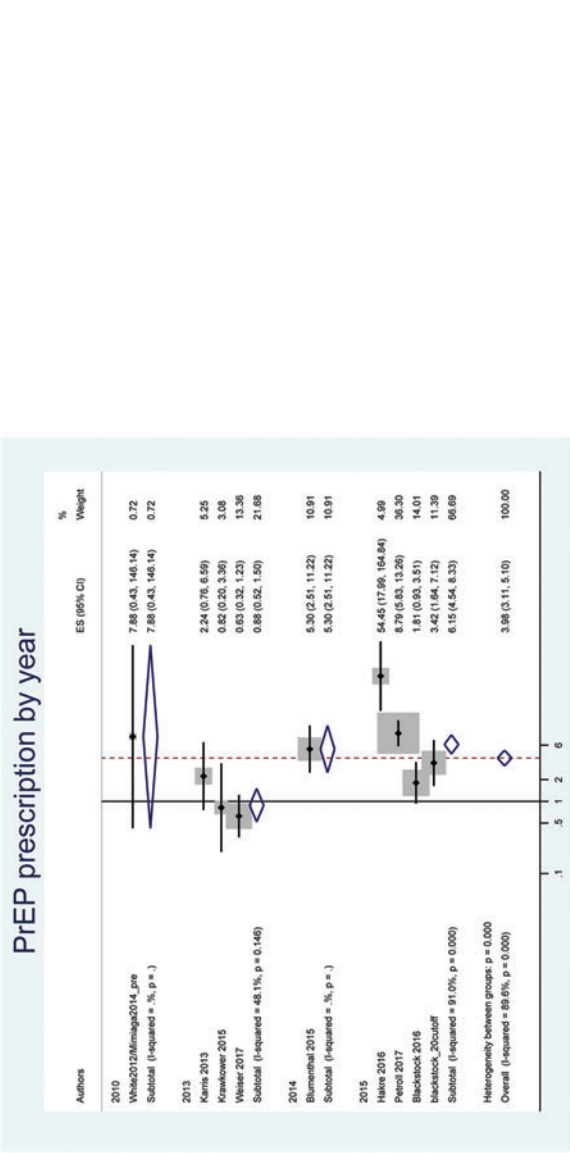

**SUPPLEMENTARY FIG. S3.** PrEP awareness, willingness, and prescription between infectious specialists and PCPs (forest plot by years).
