# Supplementary material
Source: PubMed Central journal article supplement (PMC6918849)
Supplement: Suppl_FigS4.pdf [file Suppl_FigS4.pdf]

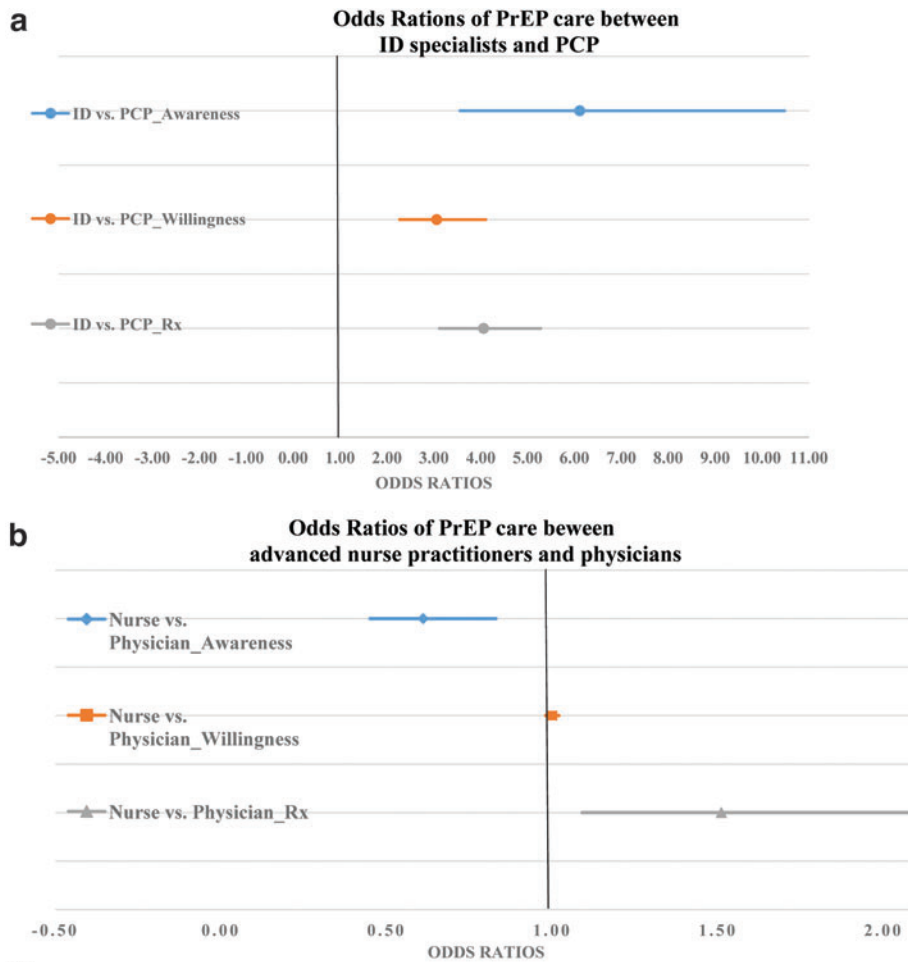

Notes:

a.  $I^2$  and corresponding uncertainty level for figure 4a:  $I^2$ \_awareness = 47.9% (0, 80.9%);  $I^2$ \_willingness=93.6% (88.0%,96.6%);  $I^2$ \_Rx=90.9% (84.4%, 94.6%)  
 b.  $I^2$  and corresponding uncertainty level for figure 4b:  $I^2$ \_awareness=0.0% (n/a);  $I^2$ \_willingness=40.7% (0,78.1%);  $I^2$ \_Rx=28.1% (0, 73.3%)

**SUPPLEMENTARY FIG. S4.** Odds ratios of PrEP care implementation among different types of health providers.<sup>a,b</sup> **(a)** Odds ratios of PrEP care between ID specialists and PCP. **(b)** Odds ratios of PrEP care between advanced nurse practitioners and physicians. <sup>a</sup> $I^2$  and corresponding uncertainty level for **(a)**:  $I^2$ \_awareness = 47.9% (0–80.9%);  $I^2$ \_willingness = 93.6% (88.0–96.6%);  $I^2$ \_Rx = 90.9% (84.4–94.6%). <sup>b</sup> $I^2$  and corresponding uncertainty level for **(b)**:  $I^2$ \_awareness = 0.0% (n/a);  $I^2$ \_willingness = 40.7% (0–78.1%);  $I^2$ \_Rx = 28.1% (0–73.3%). ID, infectious disease; PCP, primary care provider.
