# Supplementary material
Source: PubMed Central journal article supplement (PMC6918849)
Supplement: Suppl_FigS5.pdf [file Suppl_FigS5.pdf]

**PrEP awareness, willingness and prescription between nurse practitioners and physicians (Forest plot by years)**

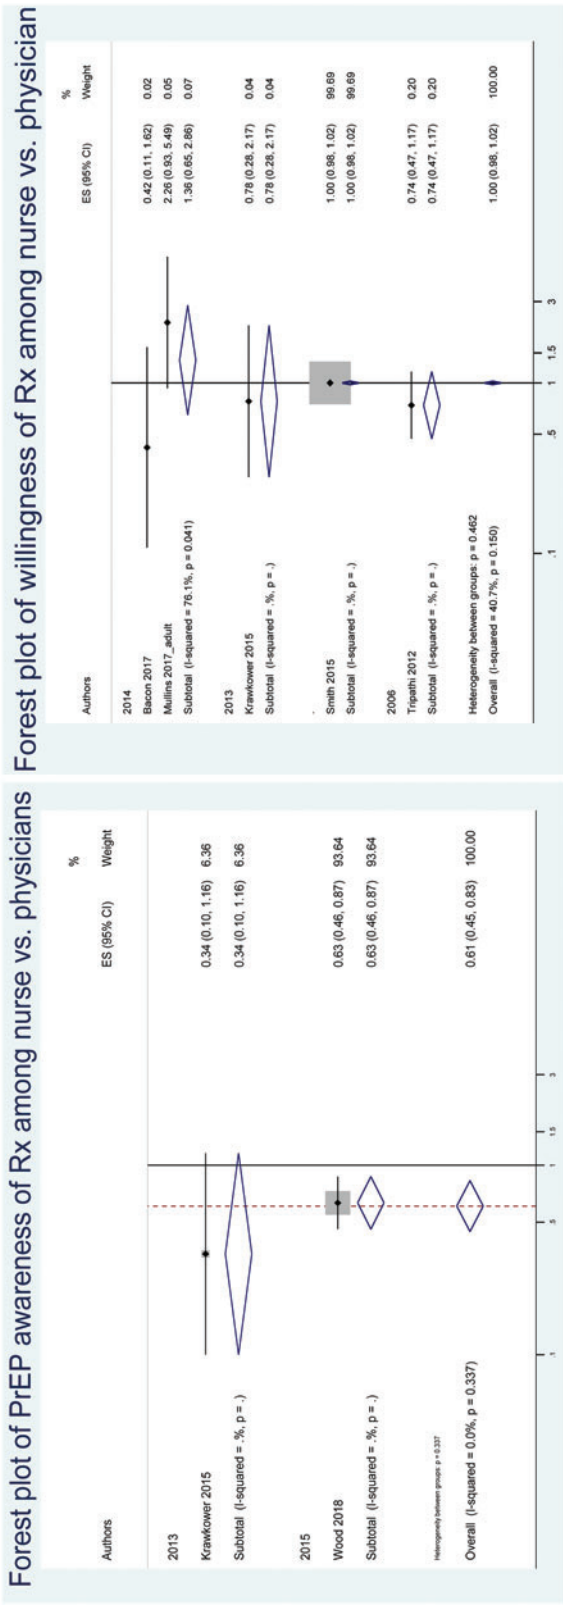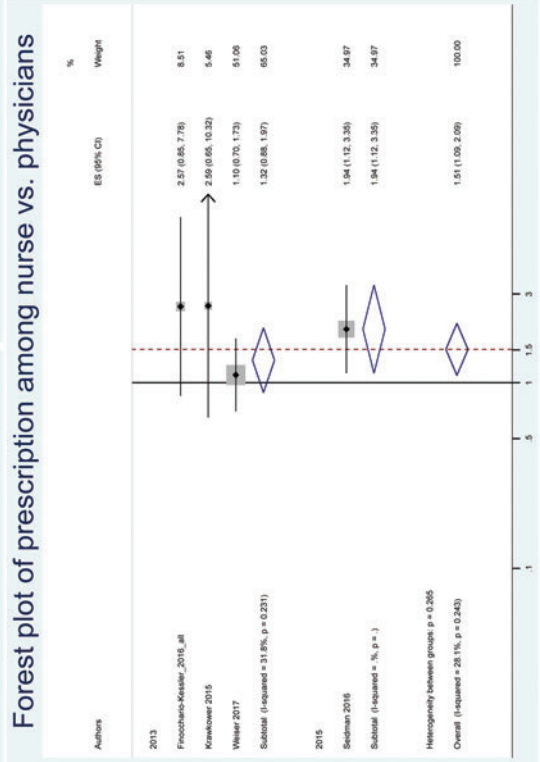

**SUPPLEMENTARY FIG. S5.** PrEP awareness, willingness, and prescription between nurse practitioners and physicians (forest plot by years).
