# Supplementary material
Source: PubMed Central journal article supplement (PMC6918849)
Supplement: Suppl_FigS6.pdf [file Suppl_FigS6.pdf]

**a** Publication bias among studies examining PrEP awareness prescription

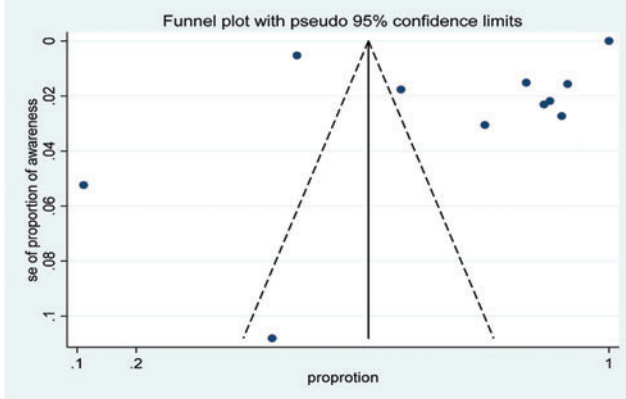

Notes: Egger's test  $P = 0.069$ ,  $n=10$

**b** Publication bias among studies examining willingness of PrEP

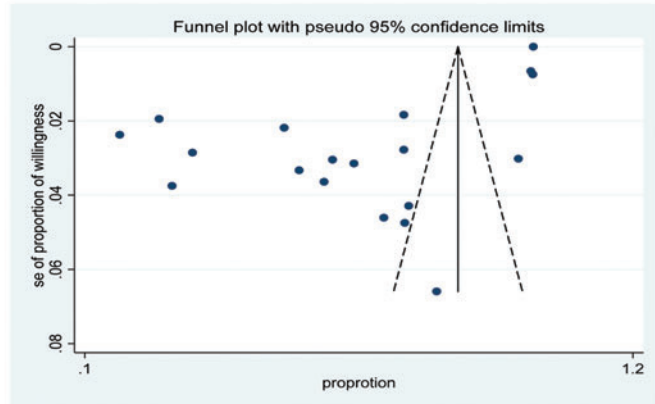

Notes: Egger's test  $P = 0.002$ ,  $n=18$

**c** Publication bias among studies examining PrEP prescription

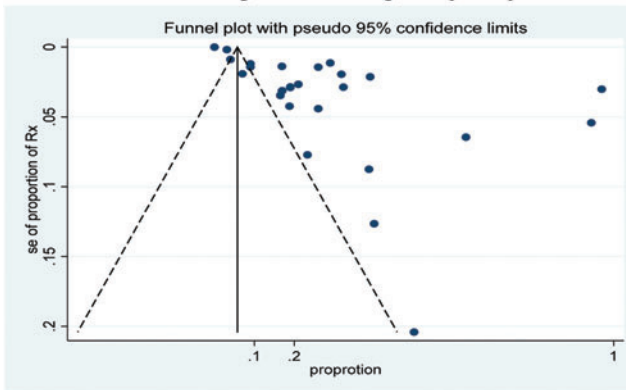

Notes: Egger's test  $P = 0.000$ ,  $n=26$

**d** Publication bias among studies examining PrEP consultation

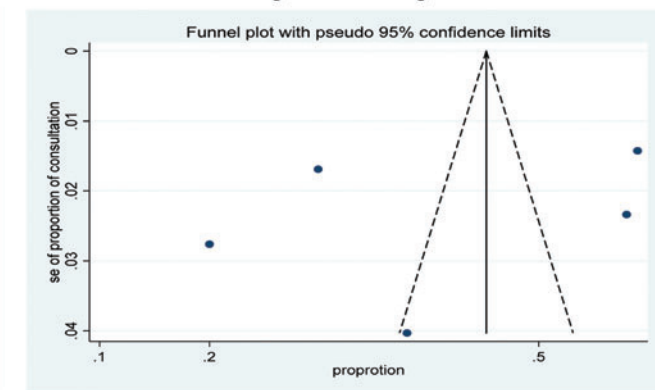

Notes:  $P = 0.519$ ,  $n=5$

**SUPPLEMENTARY FIG. S6.** Funnel plots for PrEP care implementation for publication biases assessment. **(a)** Publication bias among studies examining PrEP awareness. **(b)** Publication bias among studies examining willingness of PrEP prescription. Egger's test  $p = 0.069$ ,  $n = 10$ ; Egger's test  $p = 0.002$ ,  $n = 18$ . **(c)** Publication bias among studies examining PrEP prescription. **(d)** Publication bias among studies examining PrEP consultation. Egger's test  $p = 0.000$ ,  $n = 26$ ;  $p = 0.519$ ,  $n = 5$ .
