# Supplementary material
Source: PubMed Central journal article supplement (PMC6918849)
Supplement: Suppl_TableS2.pdf [file Suppl_TableS2.pdf]

SUPPLEMENTARY TABLE S2. KEY SEARCHING TERMS FOR THE CURRENT STUDY (BY DECEMBER 31, 2018)

| <i>Search terms</i>                                                                                                                                                                                                                                                                                                                                                                                                                                                                                       | <i>Search results</i> |
|-----------------------------------------------------------------------------------------------------------------------------------------------------------------------------------------------------------------------------------------------------------------------------------------------------------------------------------------------------------------------------------------------------------------------------------------------------------------------------------------------------------|-----------------------|
| #1 “HIV”[Mesh] or “HIV”[tiab] or “HIV Infections”[Mesh] or “HIV Antibodies”[Mesh] or HIV-1[tiab] or HIV1[tiab] or HIV-2[tiab] or HIV2[tiab] or “HIV/AIDS”[tiab] or “Sexually Transmitted Diseases, Viral”[Mesh:NoExp] or “human immunodeficiency virus”[tiab] or “human immunodeficiency virus”[tiab] or “human immune deficiency virus”[tiab] or “AIDS”[tiab] or “acquired immunodeficiency syndrome”[tiab] or “acquired immunodeficiency syndrome”[tiab] or “acquired immune deficiency syndrome”[tiab] | 423,728               |
| #2 “Pre-exposure prophylaxis”[Mesh] or “PrEP”[MeSH] or “Pre Exposure Prophylaxis”[tiab] or “PrEP”[tiab] or “Prophylaxi”[Mesh] or “Prophylaxi”[tiab] or “Pre-Exposure Prophylaxis (PrEP)”[tiab] or “Pre Exposure Prophylaxis (PrEP)”[tiab] or “Pre-Exposure Prophylaxi (PrEP)”[tiab] or “Prophylaxi, Pre-Exposure (PrEP)”[tiab] or “Prophylaxis, Pre-Exposure (PrEP)”[tiab]                                                                                                                                | 5,112                 |
| #3 “physician”[tiab] or “health care provider”[tiab] or “health care workers”[Mesh] or “providers”[tiab] or “health professionals”[tiab] or “health personnel” [tiab] or “community health workers”[tiab] or “family medicine providers”[tiab] or “pharmacists”[tiab] or “obgyn”[tiab] or “OB-GYN”[tiab] or “obstetrics & gynecology”[tiab] or “reproductive providers”[tiab] or “providers” [tiab]                                                                                                       | 346,079               |
| #4 “nurses”[tiab] or “nurse practitioners”[tiab] or “nursing cohort”[Mesh] or “certified nurses”[tiab] or “registered nurses”[tiab] or “family nurse practitioners” [tiab] or “community health workers”[tiab] or “family medicine providers”[tiab] or “nurse midwives”[tiab] or “certified nurses”[tiab] or “nurse clinicians”[tiab]                                                                                                                                                                     | 178,182               |
| #5 #1 and #2 and #3 or #4                                                                                                                                                                                                                                                                                                                                                                                                                                                                                 | 300                   |

Databases including PubMed/MEDLINE, Web of Science, PsycINFO, EMBASE, and Google Scholar. PrEP, pre-exposure prophylaxis.
