# Supplementary material
Source: PubMed Central journal article supplement (PMC6918849)
Supplement: Suppl_TableS3-S5.pdf [file Suppl_TableS3-S5.pdf]

SUPPLEMENTARY TABLE S3. KEY CHARACTERISTICS OF INCLUDED QUANTITATIVE STUDIES (N=26)

| <i>First author (year)</i>       | <i>Location</i>        | <i>Time of survey</i> | <i>Characteristics of participants</i>                                                             | <i>No. of participants</i> | <i>Recruitment/sampling regime</i>                                                                                                                                                                                                                                                                                                                                                                                                                         | <i>Study design</i> | <i>Key measurement</i>                                         |
|----------------------------------|------------------------|-----------------------|----------------------------------------------------------------------------------------------------|----------------------------|------------------------------------------------------------------------------------------------------------------------------------------------------------------------------------------------------------------------------------------------------------------------------------------------------------------------------------------------------------------------------------------------------------------------------------------------------------|---------------------|----------------------------------------------------------------|
| Adams (2016) <sup>S1</sup>       | Mixed                  | June 2014             | HIV care providers with 47.3% being female                                                         | N=260                      | Members of the American Academy of HIV Medicine (AAHIVM) were invited through e-mail to complete the survey/convenience sampling                                                                                                                                                                                                                                                                                                                           | Cross-sectional     | Hypothetical willingness of prescription                       |
| Bacon (2017) <sup>S2</sup>       | San Francisco          | May 2014              | A mixed group of HIV specialists and nonspecialists: aged 43 years (median); 56% female, 69% white | N=99                       | A 20-item electronic structured questionnaire was e-mailed to PCPs in May 2014 through the nine-county San Francisco Bay Area Collaborative Research Network/convenience sampling                                                                                                                                                                                                                                                                          | Cross-sectional     | PrEP knowledge, prior PrEP prescribing experience              |
| Blackstock (2016) <sup>S38</sup> | Mixed                  | April to May 2015     | A total of 266 PCPs were included                                                                  | N=266                      | Members of a national professional organization for academic PCP/convenience sampling                                                                                                                                                                                                                                                                                                                                                                      | Cross-sectional     | PrEP awareness, PrEP adoption and PrEP knowledge and attitudes |
| Blaylock (2018) <sup>S3</sup>    | Mixed                  | 2015–2017             | Medical providers recruited from military service system                                           | N=1599                     | Army, navy, and air force health care providers were asked to respond to a web-based survey/convenience sampling                                                                                                                                                                                                                                                                                                                                           | Cross-sectional     | PrEP knowledge, endorsement and PrEP                           |
| Blumenthal (2015) <sup>S4</sup>  | New Yew and California | 2014                  | HIV and non-HIV health care providers aged 40 years (mean), 59% being white, and 60% being female  | N=233                      | Providers who work at the UCSD HIV or Infectious Diseases Clinics and regularly attend AIDS rounds but were not present when the study was offered were asked to complete the survey during their office hours. HIV providers in Los Angeles who are part of a Southern California research group with access to the iPads but with no prior knowledge of this study were also asked to complete the survey during their office hours/convenience sampling | Cross-sectional     | PrEP knowledge; PrEP perception; PrEP prescription experience  |

(continued)

SUPPLEMENTARY TABLE S3. (CONTINUED)

| <i>First author (year)</i>     | <i>Location</i>               | <i>Time of survey</i>                             | <i>Characteristics of participants</i>                                                                                                        | <i>No. of participants</i>     | <i>Recruitment/sampling regime</i>                                                                                                                                                                             | <i>Study design</i> | <i>Key measurement</i>                                                      |
|--------------------------------|-------------------------------|---------------------------------------------------|-----------------------------------------------------------------------------------------------------------------------------------------------|--------------------------------|----------------------------------------------------------------------------------------------------------------------------------------------------------------------------------------------------------------|---------------------|-----------------------------------------------------------------------------|
| Calabrese (2014) <sup>S5</sup> | Northeastern United States    | January 2013                                      | Medical school students: age (mean = 25.7, SD = 2.8), 50% female, 48% white                                                                   | N = 102                        | Medical school students in the northeastern United States were recruited to participate in an anonymous online survey/convenience sampling                                                                     | Cross-sectional     | Hypothetical willingness of PrEP prescription based upon patients' races    |
| Castel (2015) <sup>S6</sup>    | Miami, FL, and Washington, DC | March 2012–2013                                   | HIV providers in Miami, FL, and Washington, DC, who had treated at least one HIV+ patient                                                     | N = 142                        | Listing of HIV providers from physician societies, training centers, and health departments in both cities was used to identify potential participants/convenience sampling                                    | Cross-sectional     | PrEP knowledge, experience, and likelihood of prescribing                   |
| Clement (2017) <sup>S39</sup>  | North Carolina                | Baseline: October 2015; post-test: September 2016 | PCPs at an academic medical center; at baseline: 56/115 = 48.7% are female; 94/115 (81.7%) are white. Most seeing MSM patients                | Baseline = 115, follow-up = 79 | An online survey was sent to a large network of PCPs at an academic medical center in North Carolina/convenience sampling                                                                                      | Pre-post            | PrEP prescription; HIV knowledge                                            |
| Edelman (2017) <sup>S7</sup>   | Mixed                         | April to May 2015                                 | Members of a society for academic general internists: aged 41 years, 72% were white, 62% were women, and most were attending physicians (79%) | N = 250                        | Convenience sampling among members of the Society of General Internal Medicine using Qualtrics for web-based survey                                                                                            | Cross-sectional     | Hypothetical willingness of PrEP prescription among people who inject drugs |
| Hakre (2016) <sup>S8</sup>     | San Antoni, TX                | 2015                                              | PCPs and ID physicians working at Air Force HIV Medical Evaluation Unit, with mean age of 36.7 years, 41% being female and 74% being white    | N = 403                        | The director of the Air Force HIV Medical Evaluation Unit contacted active duty PCPs and ID physicians by e-mail with an invitation to participate in a web-based needs assessment survey/convenience sampling | Cross-sectional     | Experience and willingness of PrEP provision                                |
| Karris (2014) <sup>S40</sup>   | Mixed                         | June to July 2013                                 | Adult ID physicians across the country                                                                                                        | N = 573                        | An electronic survey was sent by staff at the EIN coordinating center to members with an adult ID practice/convenience sampling                                                                                | Cross-sectional     | Prescription experience                                                     |

(continued)

SUPPLEMENTARY TABLE S3. (CONTINUED)

| <i>First author (year)</i>        | <i>Location</i> | <i>Time of survey</i>      | <i>Characteristics of participants</i>                                                                                                                                                                                                                | <i>No. of participants</i> | <i>Recruitment/sampling regime</i>                                                                                                                                                    | <i>Study design</i> | <i>Key measurement</i>                                                                               |
|-----------------------------------|-----------------|----------------------------|-------------------------------------------------------------------------------------------------------------------------------------------------------------------------------------------------------------------------------------------------------|----------------------------|---------------------------------------------------------------------------------------------------------------------------------------------------------------------------------------|---------------------|------------------------------------------------------------------------------------------------------|
| Krakower (2016) <sup>S9-S11</sup> | Boston, MA      | 2015                       | Primary care clinicians with mean age of 37 years, 53% being female and 81% being white                                                                                                                                                               | N=32                       | All PCPs (n=35) at Fenway Health were invited to complete anonymous 35-item surveys assessing experiences with PrEP provision/convenience sampling.                                   | Cross-sectional     | Experience and willingness of PrEP provision                                                         |
| Krakower (2016) <sup>S9-S11</sup> | Mixed           | September 2014             | Almost half of the 1,191 active members invited (48.1%) participated; 415 (72.4%) were HIV care providers                                                                                                                                             | N=1191                     | An electronic or faxed confidential survey was sent to the 1,320 Emerging Infectious Network members practicing adult IDs/convenience sampling                                        | Cross-sectional     | PrEP prescription and consultation                                                                   |
| Krawkower (2015) <sup>S41</sup>   | New England     | September to December 2013 | Health care providers in New England: age (mean=44 years), 58% were female and 82% were white                                                                                                                                                         | N=184                      | Health care practitioners affiliated with a regional AIDS Education and Training Center in New England were invited to complete online surveys/convenience sampling                   | Cross-sectional     | PrEP awareness and prescription, willingness of PrEP prescription                                    |
| Mullins (2017) <sup>S12</sup>     | 14 US locations | January and April 2014     | Clinicians who were based at one of the 14 US locations and provided care to HIV-infected youth: age=45.9 years (SD=10.7); half (n=27, 5%) self-described as non-Hispanic white; 43 (77%) reported female gender at birth (n=36; 64%) were physicians | N=56                       | Online survey: participants were recruited through the National Institutes of Health funded Adolescent Medicine Trials Network for HIV/AIDS; interventions (ATN)/convenience sampling | Cross-sectional     | Intention to prescribe PrEP; actual prescription of PrEP to adults and adolescents                   |
| Scherer (2014) <sup>S13</sup>     | New York City   | October 2013               | New York area care providers for PLWHA: 71% (n=71) are female; 60% are white (n=87); age (mean) = 50 (24–69)                                                                                                                                          | N=145                      | Distributed during a HIV-related conference/convenience sampling                                                                                                                      | Cross-sectional     | Attitudes, knowledge, and practice pattern toward fertility and conception in serodiscordant couples |

(continued)

SUPPLEMENTARY TABLE S3. (CONTINUED)

| <i>First author (year)</i>      | <i>Location</i> | <i>Time of survey</i>   | <i>Characteristics of participants</i>                                                                                                                                                                     | <i>No. of participants</i>                                                                                                                                                              | <i>Recruitment/sampling regime</i>                                                                                                                               | <i>Study design</i> | <i>Key measurement</i>                                                   |
|---------------------------------|-----------------|-------------------------|------------------------------------------------------------------------------------------------------------------------------------------------------------------------------------------------------------|-----------------------------------------------------------------------------------------------------------------------------------------------------------------------------------------|------------------------------------------------------------------------------------------------------------------------------------------------------------------|---------------------|--------------------------------------------------------------------------|
| Seidman (2016) <sup>S14</sup>   | Mixed           | 2015                    | Family planning providers: being female (95%), being white (81%), being a nurse practitioner or physician assistant (53%), being 55 years old and over (42%) and seeing 20 or more patients per week (58%) | <i>N</i> = 495                                                                                                                                                                          | Family planning providers recruited through website postings, national meetings, and e-mail completed an anonymous survey/convenience sampling                   | Cross-sectional     | PrEP prescribing experience                                              |
| Shaeer (2014) <sup>S15</sup>    | Florida         | March to July 2013      | Pharmacists practicing in FL: white (67%), women (50%), age (mean = 45.7, SD = 13.9)                                                                                                                       | <i>N</i> = 225                                                                                                                                                                          | In-person surveys were distributed during a state pharmacist meeting and online anonymous survey were sent through FL pharmacist newsletter/convenience sampling | Cross-sectional     | Experience of dispensing PrEP, willingness of providing consultation     |
| Smith (2015) <sup>S16</sup>     | Mixed           | 2009–2015               | Physicians and nurse practitioners were surveyed in 2009–2015                                                                                                                                              | <i>N</i> = 1,500 (2009); <i>N</i> = 1,504 (2010); <i>N</i> = 1,503 (2012); <i>N</i> = 251 (2012, pharmacist); <i>N</i> = 1,507 (2013); <i>N</i> = 1,508 (2014); <i>N</i> = 1,751 (2015) | Web-based surveys with a main sample of primary care physicians and additional samples of other selected specialties/convenience sampling                        | Cross-sectional     | Willingness and prescription of PrEP                                     |
| Tellalian (2013) <sup>S17</sup> | Mixed           | April to September 2011 | Members of AAHIVM, with 44% females                                                                                                                                                                        | <i>N</i> = 189                                                                                                                                                                          | Survey was sent to members of AAHIVM/convenience sampling                                                                                                        | Cross-sectional     | Knowledge, perceptions, attitudes, prescription, and concerns about PrEP |

(continued)

SUPPLEMENTARY TABLE S3. (CONTINUED)

| <i>First author (year)</i>                                     | <i>Location</i>                | <i>Time of survey</i>          | <i>Characteristics of participants</i>                                                                                                                                                                                                                                                                                                        | <i>No. of participants</i> | <i>Recruitment/sampling regime</i>                                                                                                                                                                                                                                                          | <i>Study design</i> | <i>Key measurement</i>                                                        |
|----------------------------------------------------------------|--------------------------------|--------------------------------|-----------------------------------------------------------------------------------------------------------------------------------------------------------------------------------------------------------------------------------------------------------------------------------------------------------------------------------------------|----------------------------|---------------------------------------------------------------------------------------------------------------------------------------------------------------------------------------------------------------------------------------------------------------------------------------------|---------------------|-------------------------------------------------------------------------------|
| Tripathi (2012) <sup>S18,a</sup>                               | South Carolina and Mississippi | September 2006 to January 2008 | Providers from sexually transmitted disease and family planning clinics: median age was 46.9 years and a majority were women [279 (78%)], non-Hispanic white [277 (78%)], non-physicians [254 (71%)], and public health care providers [223 (62%)]<br>Community pharmacists: 75% PharmD, 61% male, 42% > 10 years' experience as a pharmacist | N = 360                    | The final survey was mailed to 480 providers at sexually transmitted disease and family planning care settings/convenience sampling                                                                                                                                                         | Cross-sectional     | PrEP knowledge; hypothetical willingness of prescribing PrEP                  |
| Unni (2016) <sup>S19</sup>                                     | Utah                           | January and February 2015      |                                                                                                                                                                                                                                                                                                                                               | N = 251                    | Participants were recruited through a confidential list bought from the Utah Division of Occupational and Professional Licensing, which has a complete list of licensed Utah pharmacists/convenience sampling                                                                               | Cross-sectional     | Intention to provide consultation regarding PrEP use; PrEP knowledge          |
| Walsh (2017) <sup>S20</sup> /<br>Petroll (2017) <sup>S21</sup> | Mixed                          | July 2014 to May 2015          | A total of 280 PCPs were included in the analytical analyses with a mean age of 50 years (SD = 8), 56% white and 48% of women                                                                                                                                                                                                                 | N = 280                    | Potential participants were recruited using databases from three professional organizations. Only providers who practice in the 10 US cities with largest number of HIV cases were recruited; providers should be within zip code where HIV prevalence was at least 0.5%/purposive sampling | Cross-sectional     | PrEP awareness, and prescription, and discussion with patients regarding PrEP |
| Weiser (2017) <sup>S22</sup>                                   | Mixed                          | 2013–2014                      | Nationwide HIV care providers, with 41% being female and 64% being white                                                                                                                                                                                                                                                                      | N = 935                    | Data describing provider characteristics and practices were obtained from the 2013 to 2014 Medical Monitoring Project Provider Survey/probability sampling                                                                                                                                  | Cross-sectional     | PrEP prescribing experience                                                   |

(continued)

SUPPLEMENTARY TABLE S3. (CONTINUED)

| <i>First author (year)</i>                                        | <i>Location</i> | <i>Time of survey</i>                 | <i>Characteristics of participants</i>                                                                                                                                                  | <i>No. of participants</i>                | <i>Recruitment/sampling regime</i>                                                                       | <i>Study design</i> | <i>Key measurement</i>                                                                   |
|-------------------------------------------------------------------|-----------------|---------------------------------------|-----------------------------------------------------------------------------------------------------------------------------------------------------------------------------------------|-------------------------------------------|----------------------------------------------------------------------------------------------------------|---------------------|------------------------------------------------------------------------------------------|
| White (2012) <sup>S23</sup> /<br>Mimiaga<br>(2014) <sup>S24</sup> | Massachusetts   | Baseline: 2010;<br>follow-up:<br>2011 | Self-reported HIV specialist or generalist. pretest: 131/178 are HIV specialist, 99/178 female; age=43 years (SD=9.2); post-test: 69/115 HIV specialist, 73/115 female, age=42 (SD=9.8) | N = 178 (pretest) and N = 115 (post-test) | Massachusetts physicians were recruited through e-mail to complete an online survey/convenience sampling | Pre-post comparison | PrEP knowledge; experience and preference; motivators/barriers                           |
| Wood (2018) <sup>S25</sup>                                        | Mixed           | May 2016                              | Licensed medical providers from WA state Department of Health                                                                                                                           | N = 735                                   | Survey was sent based upon e-mail list of licensed health providers at WA/convenience sampling           | Cross-sectional     | PrEP knowledge, attitudes, prescription experience, and identify implementation barriers |

<sup>a</sup>The corresponding author has been contacted for acquiring information but authors did not respond.

AAHIVM, American Academy of HIV Medicine; EIN, Emerging Infections Network; ID, infectious disease; MSM, men who have sex with men; PCP, primary care provider; PLWHA, people living with HIV/AIDS; SD, standard deviation.

SUPPLEMENTARY TABLE S4. KEY CHARACTERISTICS OF INCLUDED QUALITATIVE STUDIES (N=10)

| <i>First author (year)</i>               | <i>Location</i> | <i>Time of survey</i>           | <i>Participants</i>                                                                                                                                                                                                | <i>N</i> | <i>Recruitment/sample regime</i>                           | <i>Key topics</i>                                                                                                                                                                                                                                                                                                  |
|------------------------------------------|-----------------|---------------------------------|--------------------------------------------------------------------------------------------------------------------------------------------------------------------------------------------------------------------|----------|------------------------------------------------------------|--------------------------------------------------------------------------------------------------------------------------------------------------------------------------------------------------------------------------------------------------------------------------------------------------------------------|
| Arnold (2012) <sup>S26</sup>             | SF/Oakland/LA   | 2011                            | Health providers including primary care physicians seeing high number of MSM and TG women, HIV specialists, community health clinic providers, and public health officials                                         | 22       | In-depth interview/snowball sampling                       | Assessing general knowledge of the iPrEx trial results and PrEP, the suggested CDC guidance, considerations of cost, the capacity of primary care practices to complete necessary billing and follow-up care, dosing schedules and toxicity monitoring, and following patients regularly over long periods of time |
| Calabrese (2016/2017) <sup>S27,S28</sup> | Nationwide      | September 2014 to February 2015 | US-based health providers with PrEP experience: mean age = 43 years (SD = 8.3), 28% female, 39% white, 67% practicing at northeastern United States and 22% practicing at southern United States                   | 18       | In-depth interview in-person or by phone/convince sampling | PrEP experience, attitudes, and prescribing intentions, risk assessment, training experiences and recommendations                                                                                                                                                                                                  |
| Collier (2017) <sup>S29</sup>            | New York City   | 2014                            | Staff participants who are participating organizations in a direct service role were eligible to participate (e.g., social workers, case managers, counselors, and intake and referral coordinators) were eligible | 21       | Focus group discussions/convenience sampling               | (1) PrEP knowledge, (2) attitudes about PrEP, (3) perceived facilitators to uptake/usage, (4) perceived barriers to uptake/usage, and (5) PrEP message preferences                                                                                                                                                 |
| Doblecki-lewis (2016) <sup>S30</sup>     | South Florida   | October to December 2014        | Six medical providers, 7 administrators, and 9 case managers: 23% non-Hispanic white, all were at least with 2 years of experience with HIV-related patients                                                       | 22       | Focus groups/convenience sampling                          | Practical concerns and perceive limitations regarding PrEP implementation                                                                                                                                                                                                                                          |

(continued)

SUPPLEMENTARY TABLE S4. (CONTINUED)

| <i>First author (year)</i>                | <i>Location</i>                                                                   | <i>Time of survey</i>         | <i>Participants</i>                                                                                                                              | <i>N</i> | <i>Recruitment/sample regime</i>                                         | <i>Key topics</i>                                                                                                                                                                                 |
|-------------------------------------------|-----------------------------------------------------------------------------------|-------------------------------|--------------------------------------------------------------------------------------------------------------------------------------------------|----------|--------------------------------------------------------------------------|---------------------------------------------------------------------------------------------------------------------------------------------------------------------------------------------------|
| Finocchario-Kessler (2016) <sup>S31</sup> | Atlanta, Baltimore, Houston, Kansas City, Newark, Philadelphia, and San Francisco | August 2013 to October 2014   | Health provider treating patients with HIV: 67.1% female, mean age of 43 years, 70.4% white                                                      | 85       | Mixed methods (survey and in-depth interviews); purposive sampling       | PrEP willingness and prescription experience                                                                                                                                                      |
| Hoffman (2016) <sup>S32</sup>             | New York City regions                                                             | Late 2012 to early 2013       | Of the 30 participants, 24 were physicians, 4 were nurse practitioners, and 2 were physician assistants                                          | 30       | In-depth interview/purposive sampling                                    | PrEP prescription experience, anticipated challenges, intention to implement PrEP care, and training needs                                                                                        |
| Krakower (2014) <sup>S33</sup>            | Boston                                                                            | May to June 2012              | HIV care providers: 66% white, 82% practice at hospital-based clinics and 18% practice at a community health center                              | 39       | Focus groups/convenience sampling                                        | Perceived barriers and facilitators to PrEP implementation                                                                                                                                        |
| Krakower (2017) <sup>S34</sup>            | Boston/MA                                                                         | September 2013 to August 2014 | 12 PCPs from LGBT specialist and 19 PCPs from a general academic medical center                                                                  | 31       | In-depth interview/purposive sampling                                    | How they approach decisions about prescribing PrEP to MSM and their experiences with PrEP provision                                                                                               |
| Mullins (2015/2016) <sup>S35, S36</sup>   | Nationwide                                                                        | 2012–2013                     | US clinicians caring for HIV-infected and at-risk youth                                                                                          | 15       | In-depth interview/convince sampling                                     | Belief about the role of PrEP in HIV prevention for adolescents, perceived barriers/facilitators regarding PrEP care                                                                              |
| Spector (2015) <sup>S37</sup>             | New York City                                                                     | 2013                          | 36 providers were surveyed from 6 outpatient substance abuse treatment clinics, with 8 medical providers, 6 clinic directors, and 22 counsellors | 36       | Semistructured interview/community-based participatory research approach | Limited awareness of PrEP, ambivalent perspectives toward offering PrEP, challenges in delivering PrEP, concerns about adherence, safety/side effects, and barriers to conducting clinical trials |

CDC, Centers for Disease Control and Prevention; iPrEx, Preexposure Prophylaxis Initiative; LGBT, lesbian, gay, bisexual, and transgender; TG, transgendered.



SUPPLEMENTARY TABLE S5. PREP IMPLEMENTATION CASCADE FROM 2013 TO 2015

|                     | <i>Study</i>             | <i>ES</i>               | <i>95%CI</i>     | <i>% weight</i>  |               |
|---------------------|--------------------------|-------------------------|------------------|------------------|---------------|
| <b>Awareness</b>    | Smith 2015 (2013)        | 0.51                    | 0.48–0.54        | 11.41            |               |
|                     | Smith 2015 (2014)        | 0.61                    | 0.59–0.62        | 11.41            |               |
|                     | Smith 2015 (2015)        | 0.66                    | 0.64–0.68        | 11.42            |               |
|                     | Krawkower 2015           | 0.89                    | 0.84–0.93        | 10.93            |               |
|                     | Collier 2017             | 0.38                    | 0.21–0.59        | 8.04             |               |
|                     | Bacon 2017               | 0.92                    | 0.85–0.96        | 10.51            |               |
|                     | Petroll 2017             | 0.44                    | 0.40–0.48        | 11.28            |               |
|                     | Blackstock 2016          | 0.93                    | 0.89–0.95        | 11.09            |               |
|                     | Spector 2015             | 0.11                    | 0.04–0.25        | 9.17             |               |
|                     | Dobleck-Lewis 2015       | 1.00                    | 0.61–1.00        | 4.75             |               |
|                     | <b>Random pooled ES</b>  | <b>0.66</b>             | <b>0.55–0.77</b> | <b>100.00</b>    |               |
| <b>Willingness</b>  | Karris 2013              | 0.74                    | 0.70–0.77        | 5.86             |               |
|                     | Calabrese 2014           | 0.75                    | 0.66–0.82        | 5.68             |               |
|                     | Shaeer 2013              | 0.53                    | 0.46–0.59        | 5.80             |               |
|                     | Krawkower 2015           | 0.58                    | 0.51–0.65        | 5.78             |               |
|                     | Finocchairo-Kessler 2016 | 0.73                    | 0.63–0.81        | 5.64             |               |
|                     | Admas 2016               | 0.60                    | 0.54–0.65        | 5.81             |               |
|                     | Calabrese 2016/2017      | 1.00                    | 0.82–1.00        | 4.86             |               |
|                     | Blumenthal 2015          | 0.64                    | 0.58–0.70        | 5.80             |               |
|                     | Bacon 2017               | 0.70                    | 0.60–0.78        | 5.67             |               |
|                     | Krawkower 2016b          | 0.97                    | 0.84–0.99        | 5.26             |               |
|                     | Seidman 2016             | 0.25                    | 0.21–0.29        | 5.85             |               |
|                     | Unni 2016                | 0.17                    | 0.13–0.22        | 5.81             |               |
|                     | Edelman 2017             | 0.74                    | 0.68–0.79        | 5.81             |               |
|                     | Clement 2017             | 1.00                    | 0.96–1.00        | 5.70             |               |
|                     | Petroll 2017             | 0.50                    | 0.46–0.54        | 5.86             |               |
|                     | Blackstock 2016          | 0.32                    | 0.26–0.37        | 5.81             |               |
|                     | Spector 2015             | 0.81                    | 0.65–0.90        | 5.32             |               |
|                     | Dobleck-Lewis 2015       | 1.00                    | 0.61–1.00        | 3.67             |               |
|                     | <b>Random pooled ES</b>  | <b>0.68</b>             | <b>0.56–0.79</b> | <b>100.00</b>    |               |
| <b>Consultation</b> | Shaeer 2013              | 0.22                    | 0.17–0.28        | 24.83            |               |
|                     | Scherer 2014             | 0.38                    | 0.31–0.46        | 24.28            |               |
|                     | Krakower 2016a           | 0.59                    | 0.55–0.63        | 25.46            |               |
|                     | Petroll 2017             | 0.39                    | 0.35–0.43        | 25.42            |               |
|                     |                          | <b>Random pooled ES</b> | <b>0.39</b>      | <b>0.24–0.55</b> | <b>100.00</b> |
| <b>Prescription</b> | Smith 2015 (2013)        | 0.04                    | 0.03–0.05        | 4.39             |               |
|                     | Smith 2015 (2014)        | 0.04                    | 0.03–0.05        | 4.39             |               |
|                     | Smith 2015 (2015)        | 0.07                    | 0.06–0.08        | 4.40             |               |
|                     | Karris 2013              | 0.09                    | 0.07–0.12        | 4.36             |               |
|                     | Scherer 2014             | 0.17                    | 0.12–0.24        | 4.22             |               |
|                     | Krawkower 2015           | 0.19                    | 0.14–0.25        | 4.26             |               |
|                     | Weiser 2017              | 0.26                    | 0.23–0.29        | 4.38             |               |
|                     | Finocchairo-Kessler      | 0.19                    | 0.12–0.28        | 4.10             |               |
|                     | Hoffman 2016             | 0.23                    | 0.12–0.41        | 3.62             |               |
|                     | Krawkower 2017           | 0.39                    | 0.24–0.56        | 3.64             |               |
|                     | Mullins 2016/2017        | 0.40                    | 0.20–0.64        | 3.09             |               |
|                     | Mullins 2017_adult       | 0.63                    | 0.50–0.74        | 3.95             |               |
|                     | Collier 2017             | 0.00                    | 0.00–0.15        | 3.37             |               |
|                     | Calabrese 2016/2017      | 0.94                    | 0.74–0.99        | 3.25             |               |
|                     | Blumenthal 2015          | 0.21                    | 0.16–0.27        | 4.29             |               |
|                     | Krakower 2016a           | 0.32                    | 0.28–0.36        | 4.36             |               |
|                     | Bacon 2017               | 0.26                    | 0.18–0.35        | 4.14             |               |
|                     | Hakre 2016               | 0.09                    | 0.07–0.12        | 4.34             |               |
|                     | Krakower 2016b           | 0.97                    | 0.84–0.99        | 3.66             |               |
|                     | Seidman 2016             | 0.04                    | 0.03–0.06        | 4.35             |               |
|                     | Clement 2017_Pre         | 0.17                    | 0.11–0.24        | 4.17             |               |
|                     | Petroll 2017             | 0.39                    | 0.35–0.43        | 4.36             |               |
|                     | Blackstock 2016          | 0.32                    | 0.27–0.38        | 4.31             |               |
|                     | Blaylock 2018            | 0.29                    | 0.27–0.32        | 4.40             |               |
|                     | Doblecki_Lewis 2015      | 0.83                    | 0.44–0.97        | 2.18             |               |
|                     |                          | <b>Random pooled ES</b> | <b>0.25</b>      | <b>0.18–0.33</b> | <b>100.00</b> |

## Supplementary References

- S1. Adams LM, Balderson BH. HIV providers' likelihood to prescribe pre-exposure prophylaxis (PrEP) for HIV prevention differs by patient type: A short report. *AIDS Care* 2016;28:1154–1158.
- S2. Bacon O, Gonzalez R, Andrew E, et al. Brief report: Informing strategies to build PrEP capacity among San Francisco Bay Area clinicians. *J Acquir Immune Defic Syndr* 2017;74:175–179.
- S3. Blaylock JM, Hakre S, Okulicz JF, et al. HIV preexposure prophylaxis in the U.S. military services—2014–2016. *MMWR Morb Mortal Wkly Rep* 2018;67:569–574.
- S4. Blumenthal J, Jain S, Krakower D, et al. Knowledge is power! Increased provider knowledge scores regarding pre-exposure prophylaxis (PrEP) are associated with higher rates of PrEP prescription and future intent to prescribe PrEP. *AIDS Behav* 2015;19:802–810.
- S5. Calabrese SK, Earnshaw VA, Underhill K, Hansen NB, Dovidio JF. The impact of patient race on clinical decisions related to prescribing HIV pre-exposure prophylaxis (PrEP): Assumptions about sexual risk compensation and implications for access. *AIDS Behav* 2014;18:226–240.
- S6. Castel AD, Feaster DJ, Tang W, et al. Understanding HIV care provider attitudes regarding intentions to prescribe PrEP. *J Acquir Immune Defic Syndr* 2015;70:520–528.
- S7. Edelman EJ, Moore BA, Calabrese SK, et al. Primary care physicians' willingness to prescribe HIV pre-exposure prophylaxis for people who inject drugs. *AIDS Behav* 2017;21:1025–1033.
- S8. Hakre S, Blaylock JM, Dawson P, et al. Knowledge, attitudes, and beliefs about HIV pre-exposure prophylaxis among US Air Force Health Care Providers. *Medicine (Baltimore)* 2016;95:e4511.
- S9. Krakower DS, Mayer KH. The role of healthcare providers in the roll out of preexposure prophylaxis. *Curr Opin HIV AIDS* 2016;11:41–48.
- S10. Krakower DS, Beekmann SE, Polgreen PM, Mayer KH. Diffusion of newer HIV prevention innovations: Variable practices of frontline infectious diseases physicians. *Clin Infect Dis* 2016;62:99–105.
- S11. Krakower DS, Maloney KM, Grasso C, Melbourne K, Mayer KH. Primary care clinicians' experiences prescribing HIV pre-exposure prophylaxis at a specialized community health centre in Boston: Lessons from early adopters. *J Int AIDS Soc* 2016;19:21165.
- S12. Mullins TLK, Zimet G, Lally M, Xu J, Thornton S, Kahn JA. HIV care providers' intentions to prescribe and actual prescription of pre-exposure prophylaxis to at-risk adolescents and adults. *AIDS Patient Care STDS* 2017;31:504–516.
- S13. Scherer ML, Douglas NC, Churnet BH, et al. Survey of HIV care providers on management of HIV serodiscordant couples—Assessment of attitudes, knowledge, and practices. *AIDS Care* 2014;26:1435–1439.
- S14. Seidman D, Carlson K, Weber S, Witt J, Kelly PJ. United States family planning providers' knowledge of and attitudes towards preexposure prophylaxis for HIV prevention: A national survey. *Contraception* 2016;93:463–469.
- S15. Shafer KM, Sherman EM, Shafiq S, Hardigan P. Exploratory survey of Florida pharmacists' experience, knowledge, and perception of HIV pre-exposure prophylaxis. *J Am Pharm Assoc* 2014;54:610–617.
- S16. Smith DK, Van Handel M, Wolitski RJ, et al. Vital signs: Estimated percentages and numbers of adults with indications for preexposure prophylaxis to prevent HIV acquisition—United States, 2015. *J Miss State Med Assoc* 2015;56:364–371.
- S17. Tellalian D, Maznavi K, Bredeek UF, Hardy WD. Pre-exposure prophylaxis (PrEP) for HIV infection: Results of a survey of HIV healthcare providers evaluating their knowledge, attitudes, and prescribing practices. *AIDS Patient Care STDS* 2013;27:553–559.
- S18. Tripathi A, Ogbuanu C, Monger M, Gibson JJ, Duffus WA. Preexposure prophylaxis for HIV infection: Healthcare providers' knowledge, perception, and willingness to adopt future implementation in the southern US. *South Med J* 2012;105:199–206.
- S19. Unni EJ, Lian N, Kuykendall W. Understanding community pharmacist perceptions and knowledge about HIV preexposure prophylaxis (PrEP) therapy in a Mountain West state. *J Am Pharm Assoc* 2016;56:527.e521–532.e521.
- S20. Walsh JL, Petroll AE. Factors related to pre-exposure prophylaxis prescription by U.S. primary care physicians. *Am J Prev Med* 2017;52:e165–e172.
- S21. Petroll AE, Walsh JL, Owczarzak JL, McAuliffe TL, Bogart LM, Kelly JA. PrEP awareness, familiarity, comfort, and prescribing experience among US primary care providers and HIV specialists. *AIDS Behav* 2017;21:1256–1267.
- S22. Weiser J, Garg S, Beer L, Skarbinski J. Prescribing of human immunodeficiency virus (HIV) pre-exposure prophylaxis by HIV medical providers in the United States, 2013–2014. *Open Forum Infect Dis* 2017;4:ofx003.
- S23. White JM, Mimiaga MJ, Krakower DS, Mayer KH. Evolution of Massachusetts physician attitudes, knowledge, and experience regarding the use of antiretrovirals for HIV prevention. *AIDS Patient Care STDS* 2012;26:395–405.
- S24. Mimiaga MJ, White JM, Krakower DS, Biello KB, Mayer KH. Suboptimal awareness and comprehension of published preexposure prophylaxis efficacy results among physicians in Massachusetts. *AIDS Care* 2014;26:684–693.
- S25. Wood BR, McMahan VM, Naismith K, Stockton JB, Delaney LA, Stekler JD. Knowledge, practices, and barriers to HIV preexposure prophylaxis prescribing among Washington State medical providers. *Sex Transm Dis* 2018;45:452–458.
- S26. Arnold EA, Hazelton P, Lane T, et al. A qualitative study of provider thoughts on implementing pre-exposure prophylaxis (PrEP) in clinical settings to prevent HIV infection. *PLoS One* 2012;7:e40603.
- S27. Calabrese SK, Magnus M, Mayer KH, et al. Putting PrEP into practice: Lessons learned from early-adopting U.S. providers' firsthand experiences providing HIV pre-exposure prophylaxis and associated care. *PLoS One* 2016;11:e0157324.
- S28. Calabrese SK, Magnus M, Mayer KH, et al. "Support your client at the space that they're in": HIV pre-exposure prophylaxis (PrEP) prescribers' perspectives on PrEP-related risk compensation. *AIDS Patient Care STDS* 2017;31:196–204.
- S29. Collier KL, Colarossi LG, Sanders K. Raising awareness of pre-exposure prophylaxis (PrEP) among women in New York City: Community and provider perspectives. *J Health Commun* 2017;22:183–189.

- S30. Doblecki-Lewis S, Jones D. Community federally qualified health centers as homes for HIV preexposure prophylaxis: Perspectives from South Florida. *J Int Assoc Provid AIDS Care* 2016;15:522–528.
- S31. Finocchiaro-Kessler S, Champassak S, Hoyt MJ, et al. Pre-exposure prophylaxis (PrEP) for safer conception among serodifferent couples: Findings from healthcare providers serving patients with HIV in seven US cities. *AIDS Patient Care STDS* 2016;30:125–133.
- S32. Hoffman S, Guidry JA, Collier KL, et al. A clinical home for preexposure prophylaxis: Diverse health care providers' perspectives on the "purview paradox." *J Int Assoc Provid AIDS Care* 2016;15:59–65.
- S33. Krakower D, Ware N, Mitty JA, Maloney K, Mayer KH. HIV providers' perceived barriers and facilitators to implementing pre-exposure prophylaxis in care settings: A qualitative study. *AIDS Behav* 2014;18:1712–1721.
- S34. Krakower DS, Ware NC, Maloney KM, Wilson IB, Wong JB, Mayer KH. Differing experiences with pre-exposure prophylaxis in Boston among lesbian, gay, bisexual, and transgender specialists and generalists in primary care: Implications for scale-up. *AIDS Patient Care STDS* 2017; 31:297–304.
- S35. Mullins TL, Lally M, Zimet G, Kahn JA. Clinician attitudes toward CDC interim pre-exposure prophylaxis (PrEP) guidance and operationalizing PrEP for adolescents. *AIDS Patient Care STDS* 2015;29:193–203.
- S36. Mullins TL, Zimet G, Lally M, Kahn JA. Adolescent human immunodeficiency virus care providers' attitudes toward the use of oral pre-exposure prophylaxis in youth. *AIDS Patient Care STDS* 2016;30:339–348.
- S37. Spector AY, Remien RH, Tross S. PrEP in substance abuse treatment: A qualitative study of treatment provider perspectives. *Subst Abuse Treat Prev Policy* 2015;10:1.
- S38. Blackstock OJ, Moore BA, Berkenblit GC, et al. A cross-sectional online survey of HIV pre-exposure prophylaxis adoption among primary care physicians. *J Gen Int Med* 2016;32:62–70.
- S39. Clement ME, Seidelman J, Wu J, et al. An educational initiative in response to identified PrEP prescribing needs among PCPs in the Southern U.S. *AIDS Care* 2018 May;30:650–655. doi: 10.1080/09540121.2017.1384534. Epub 2017 Oct 3. PubMed PMID: 28971705.
- S40. Karris MY, Beekmann SE, Mehta SR, Anderson CM, Polgreen PM. Are we prepped for preexposure prophylaxis (PrEP)? Provider opinions on the real-world use of PrEP in the United States and Canada. *Clinical infectious diseases: an official publication of the Infectious Diseases Society of America*. 2014;58:704–712.
- S41. Krakower DS, Oldenburg CE, Mitty JA, et al. Knowledge, beliefs and practices regarding antiretroviral medications for HIV prevention: Results from a survey of health-care providers in New England. *PLoS One* 2015;10: e0132398.
